# Supplementary material for: Specialist intellectual disability liaison nurses in general hospitals in England: cohort study using a large mortality dataset
Source: HighWire-hosted journal article supplement (doi:10.1136/bmjopen-2023-077124), 2024-08-01
Supplement: bmjopen-2023-077124supp002_data_supplement.pdf [file bmjopen-2023-077124supp002_data_supplement.pdf]

**Supplemental table S2** Association of intellectual disability liaison nurse input with care processes and quality of care rating, including unadjusted odds ratios. \*Adjusted model includes gender, age at death, ethnicity, level of intellectual disability, region of England, marital status, multi-morbidity (five or more long-term conditions), living situation and cause of death.

| Reasonable adjustments to care  |     | Reasonable adjustments made (n=3,366)  | Reasonable adjustments not made (n=1,355) | Missing | Total (n=4,721) | Unadjusted odds ratio (95%CI) | p-value | Adjusted odds ratio* (95%CI) | p-value          |
|---------------------------------|-----|----------------------------------------|-------------------------------------------|---------|-----------------|-------------------------------|---------|------------------------------|------------------|
| ID liaison nurse                | No  | 2,052 (61%)                            | 1,055 (78%)                               | 20      | 3,107 (66%)     | 1                             |         | 1                            |                  |
|                                 | Yes | 1,314 (39%)                            | 300 (22%)                                 | 1       | 1,614 (34%)     | 2.25 (1.95, 2.61)             | <0.001  | <b>1.95 (1.63, 2.32)</b>     | <b>&lt;0.001</b> |
| Best practice identified        |     | Best practice identified (n=3,047)     | Best practice not identified (n=1,660)    | Missing | Total (n=4,707) | Unadjusted odds ratio (95%CI) | p-value | Adjusted odds ratio* (95%CI) | p-value          |
| ID liaison nurse                | No  | 1,902 (62%)                            | 1,198 (72%)                               | 27      | 3,100 (66%)     | 1                             |         | 1                            |                  |
|                                 | Yes | 1,145 (38%)                            | 462 (28%)                                 | 8       | 1,607 (34%)     | 1.56 (1.37, 1.78)             | <0.001  | <b>1.37 (1.17, 1.60)</b>     | <b>&lt;0.001</b> |
| DNACPR order in place           |     | DNACPR order in place (n=3,527)        | No DNACPR order in place (n=1,193)        | Missing | Total (n=4,720) | Unadjusted odds ratio (95%CI) | p-value | Adjusted odds ratio* (95%CI) | p-value          |
| ID liaison nurse                | No  | 2,242 (64%)                            | 867 (73%)                                 | 18      | 3,109 (66%)     | 1                             |         | 1                            |                  |
|                                 | Yes | 1,285 (36%)                            | 326 (27%)                                 | 4       | 1,611 (34%)     | 1.52 (1.32, 1.76)             | <0.001  | <b>1.41 (1.18, 1.69)</b>     | <b>&lt;0.001</b> |
| DNACPR order correctly followed |     | DNACPR correctly followed (n=2,445)    | DNACPR not correctly followed (n=181)     | Missing | Total (n=2,626) | Unadjusted odds ratio (95%CI) | p-value | Adjusted odds ratio* (95%CI) | p-value          |
| ID liaison nurse                | No  | 1,528 (62%)                            | 104 (57%)                                 | 610     | 1,632 (62%)     | 1                             |         | 1                            |                  |
|                                 | Yes | 917 (38%)                              | 77 (43%)                                  | 291     | 994 (38%)       | 0.81 (0.60, 1.10)             | 0.18    | 0.81 (0.55, 1.17)            | 0.26             |
| Overall care grading            |     | Overall good quality of care (n=3,709) | Overall poor quality of care (n=999)      | Missing | Total (n=4,708) | Unadjusted odds ratio (95%CI) | p-value | Adjusted odds ratio* (95%CI) | p-value          |

|                  |     |             |           |    |             |                   |      |                   |      |
|------------------|-----|-------------|-----------|----|-------------|-------------------|------|-------------------|------|
| ID liaison nurse | No  | 2,455 (66%) | 646 (65%) | 26 | 3,101 (66%) | 1                 |      | 1                 |      |
|                  | Yes | 1,254 (34%) | 353 (35%) | 8  | 1,607 (34%) | 0.93 (0.81, 1.08) | 0.37 | 0.94 (0.78, 1.12) | 0.49 |
